# Supplementary material for: Macrodinychus mites as parasitoids of invasive ants: an overlooked parasitic association
Source: PubMed Central journal article supplement (PMC4956750; doi:10.1038/srep29995), 2016-07-21
Supplement: srep29995-s1.pdf [file srep29995-s1.pdf]

## Supplementary Information

### ***Macrodinychus* mites as parasitoids of invasive ants: an overlooked parasitic association**

Jean-Paul Lachaud<sup>1,2,\*</sup>, Hans Klompen<sup>3</sup> & Gabriela Pérez-Lachaud<sup>1</sup>

<sup>1</sup> Departamento de Conservación de la Biodiversidad, El Colegio de la Frontera Sur (ECOSUR), Avenida Centenario Km 5.5, Chetumal 77014, Quintana Roo, Mexico

<sup>2</sup> Centre de Recherches sur la Cognition Animale (CRCA), Centre de Biologie Intégrative (CBI), Université de Toulouse, CNRS, UPS, 118 route de Narbonne, 31062 Toulouse Cedex 09, France

<sup>3</sup> Department of Evolution, Ecology and Organismal Biology, Ohio State University, Columbus OH 43212, USA

#### Content:

Figure S1. Ventral view of a *Macrodinychus multispinosus* adult female.

Figure S2. Resilient exuviae of the previous stages of a mite male.

Figure S3. Host worker carrying a parasitized worker pupa.

Figure S4. Superparasitism by *Macrodinychus multispinosus*.

Table S1. Host targets of the different developmental stages of *Macrodinychus multispinosus*.

**Figure S1. Ventral view of a *Macrodirynchus multispinosus* adult female.** Scanning electron micrograph. Note that legs may be withdrawn into special depressions (pedofossae). Photo: G. Nieto.

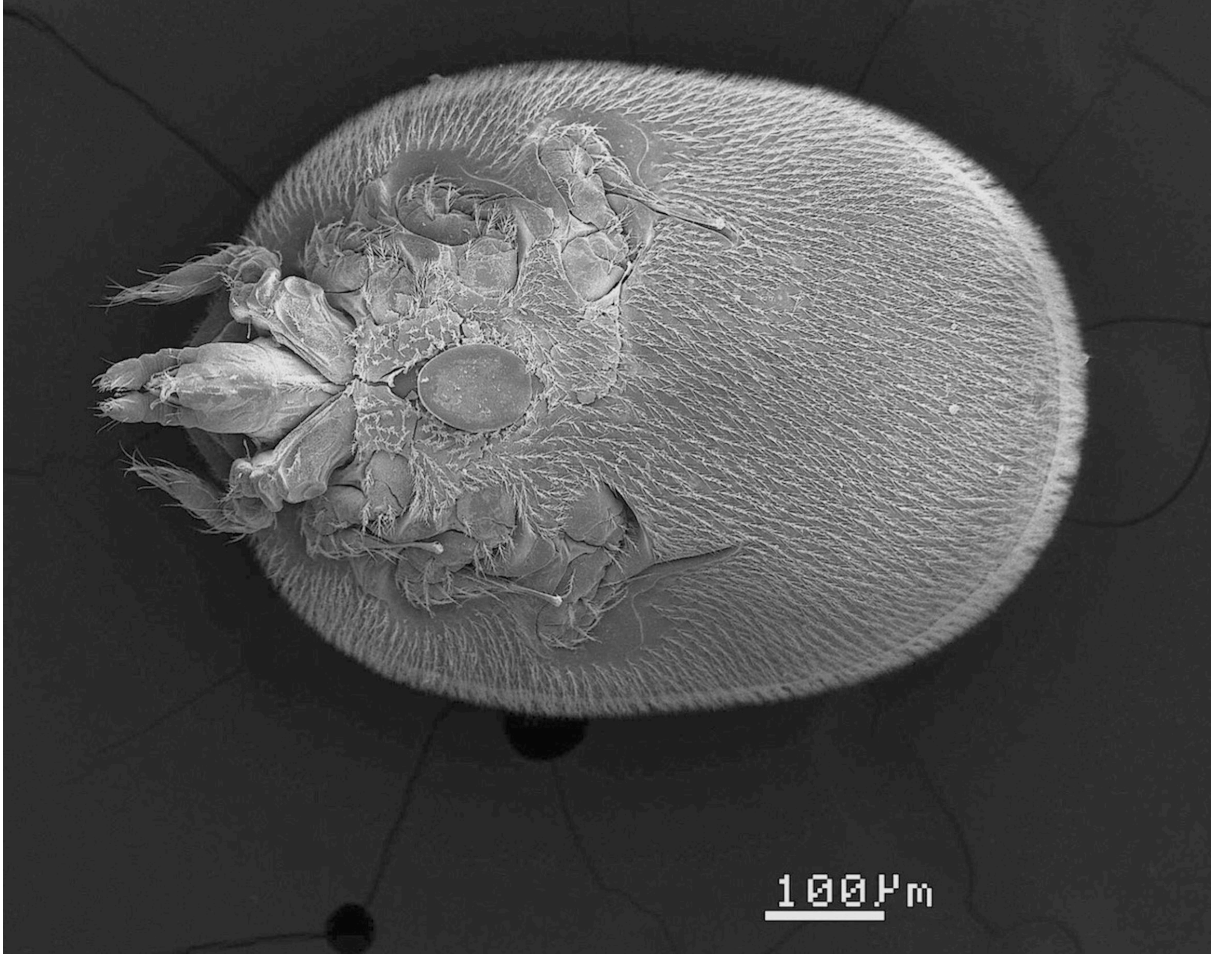

**Figure S2. Resilient exuviae of the previous stages of a mite male.** Slide-mounted exuviae of the immature stages of *Macrodinychus multispinosus*: cuticle of the larva (a) still preserved on the cuticle of the deutonymph (b). Photo: H. Klompen.

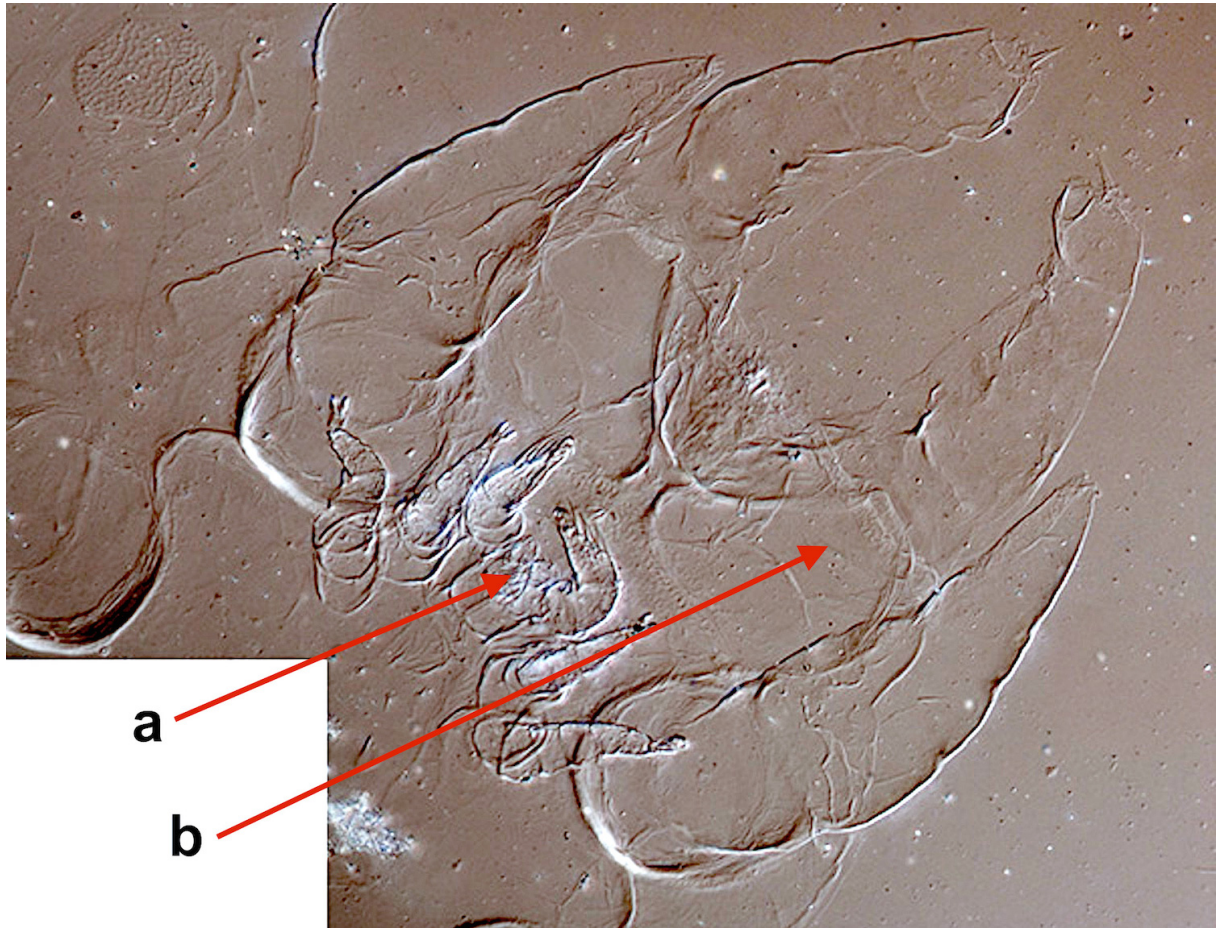

**Figure S3. Host worker carrying a parasitized worker pupa.** Alcohol preserved *Paratrechina longicornis* worker carrying in its mandibles a worker pupa parasitized by a teneral adult mite. Photo: G. Pérez-Lachaud.

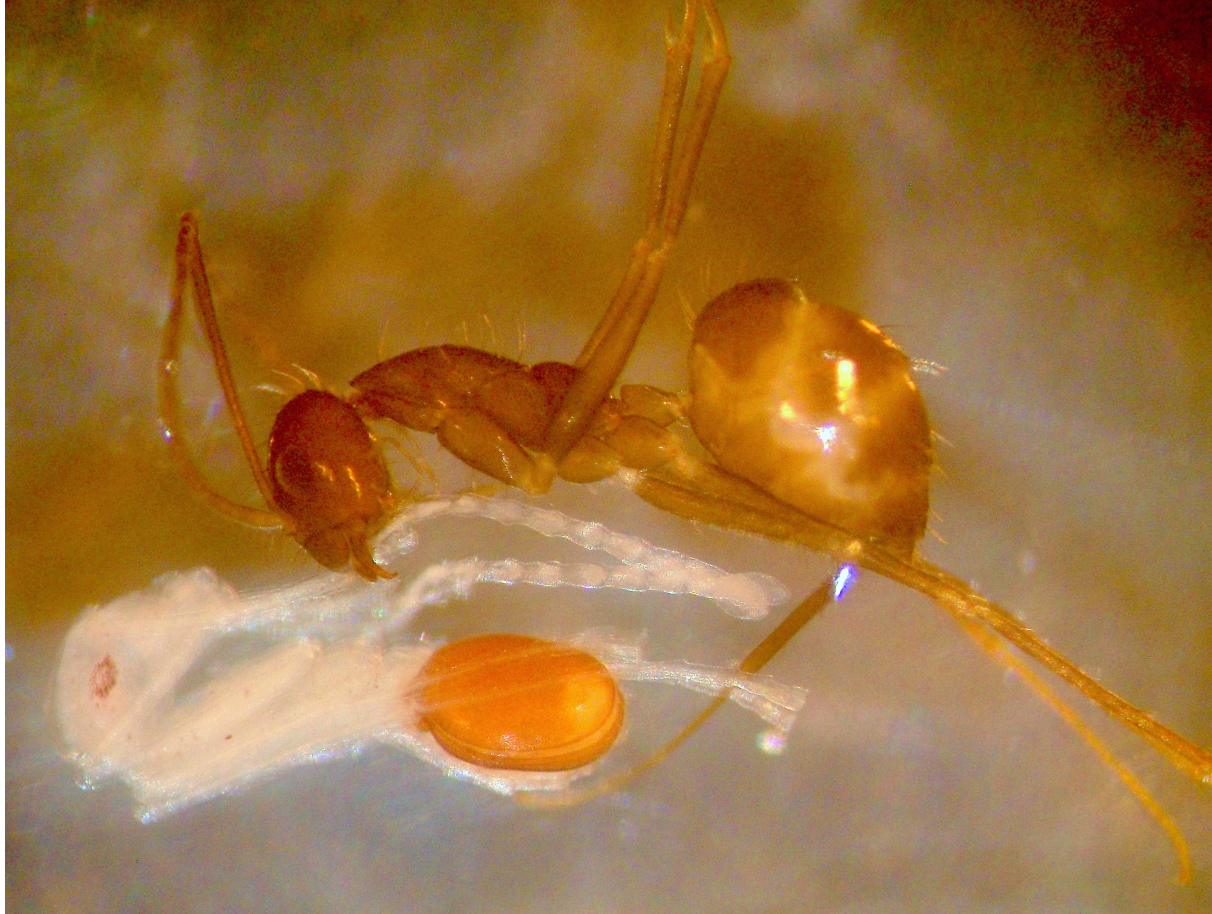

**Figure S4. Superparasitism by *Macrodimychus multispinosus*.** Rare example of a *Paratrechina longicornis* worker pupa parasitized by two deutonymphs (see arrows) of *M. multispinosus*. Photo: G. Pérez-Lachaud.

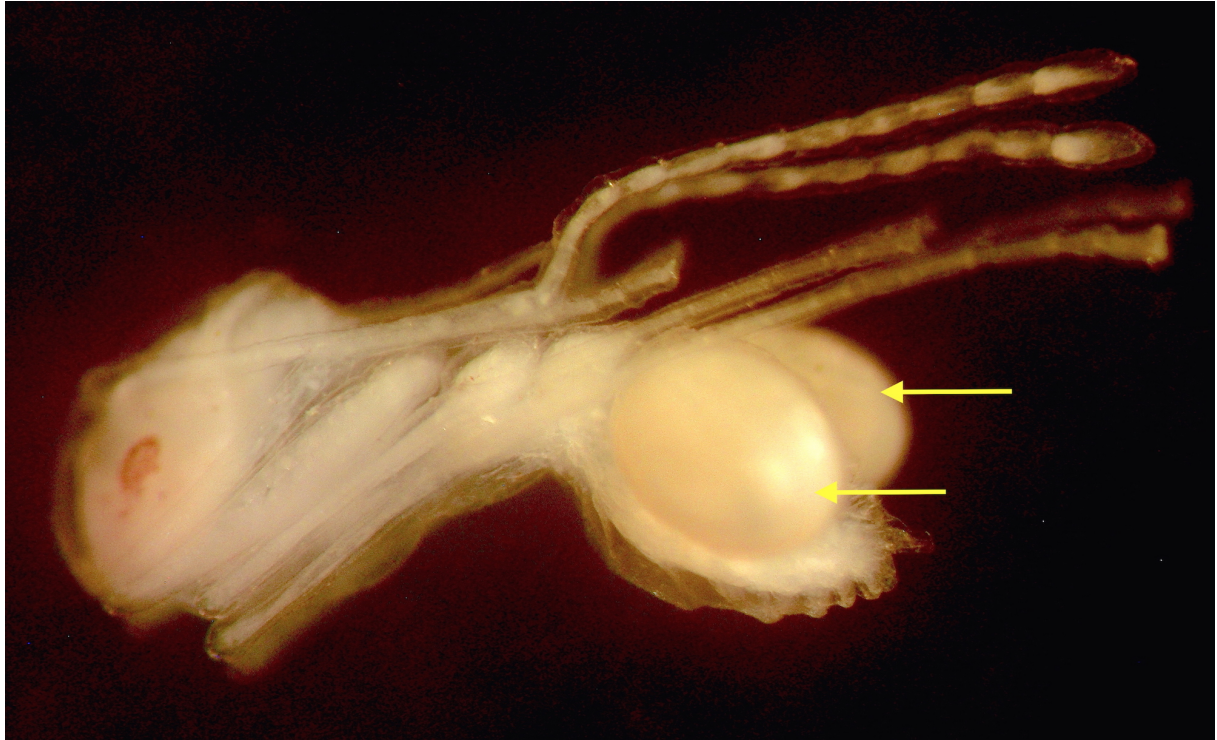

**Table S1. Host targets of the different developmental stages of *Macrodimychus multispinosus*.** Developmental stages and host caste targeted in parasitized colony samples of *Paratrechina longicornis* in three localities of southern Quintana Roo, Mexico.

| Locality | Date     | Parasitized worker pupae |             |                      | Parasitized male pupae | No. of host pupae | No. of parasitized host pupae |
|----------|----------|--------------------------|-------------|----------------------|------------------------|-------------------|-------------------------------|
|          |          | Larvae                   | Protonymphs | Deutonymphs + adults |                        |                   |                               |
| Chetumal | 09/09/14 | 0                        | 0           | 3                    | 0                      | 13                | 3                             |
|          | 11/01/14 | 0                        | 1           | 4                    | 0                      | 268               | 5                             |
| Laguna   | 01/24/15 | 2                        | 92          | 283                  | 0                      | 1596              | 377                           |
| Guerrero | 02/01/15 | 2                        | 0           | 0                    | 0                      | 30                | 2                             |
|          | 06/07/15 | 6                        | 3           | 4                    | 0                      | 178               | 13                            |
|          | 07/27/15 | 0                        | 511         | 705                  | 3                      | 1597              | 1219                          |
| Mahahual | 09/27/15 | 0                        | 1           | 9                    | 0                      | 1330              | 10                            |
|          | 09/27/15 | 0                        | 0           | 1                    | 0                      | 285               | 1                             |
| Total    |          | 10                       | 608         | 1009                 | 3                      | 5297              | 1630                          |
